# Supplementary material for: Rat bone properties and their relationship to gait during growth
Source: Oxford University Press journal article supplement (doi:10.1242/jeb.203554), 2019-01-01
Supplement: jeb203554supp.pdf [file jeb203554supp.pdf]

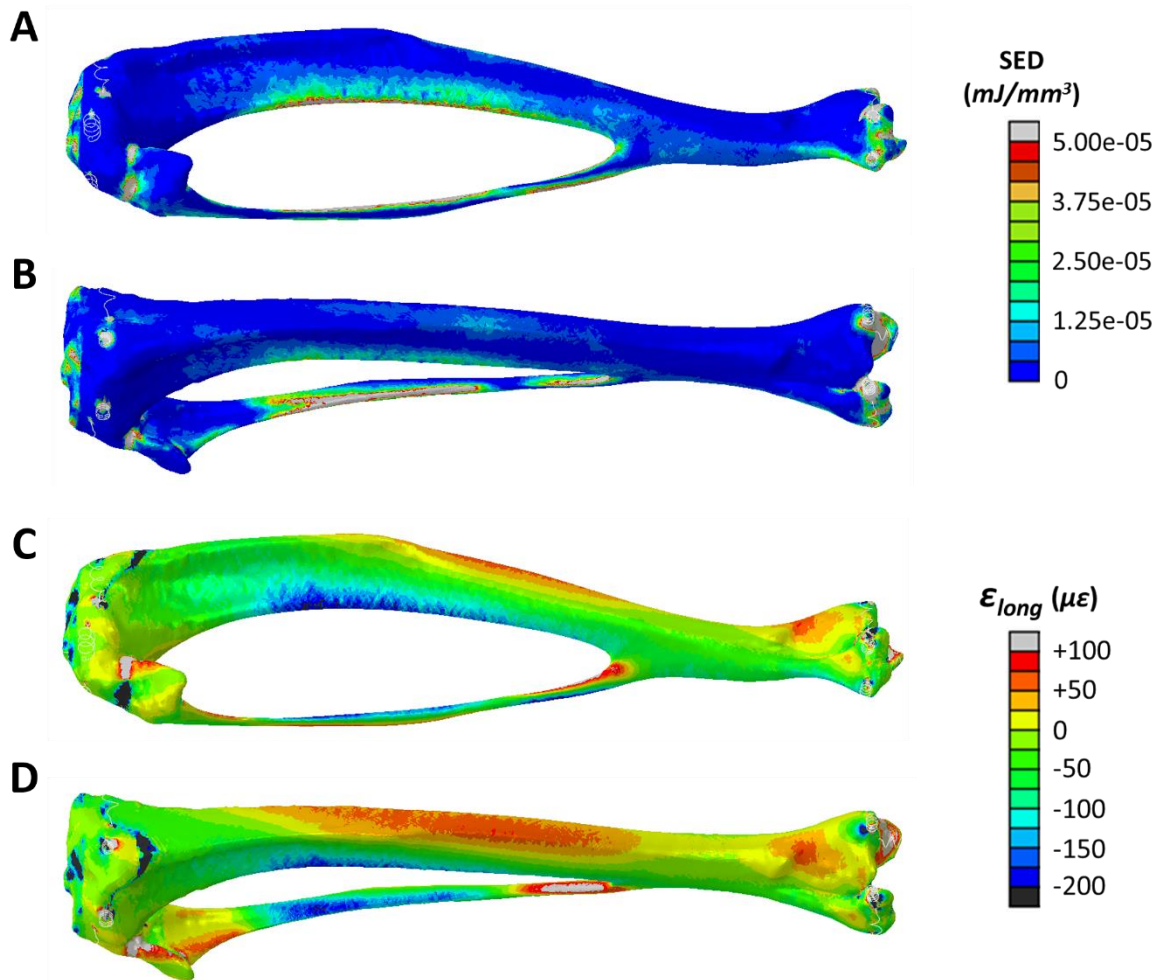

**Figure S1.** Contour plots of (A), (B) the strain energy density and (C), (D) the longitudinal strain on the surface of the rat tibia during walking. (A), (C) were shown in sagittal plane and (B), (D) were shown in frontal plane. Diaphyseal region showed the highest values compared to distal and proximal ends in both parameters.
